# Supplementary material
Source: Springer Nature journal article supplement (https://www.springermedizin.de/resource/supplementary/12937_2014_821_MOESM1_ESM.pdf/25654140)

Cathepsin S ( $\mu\text{g/L}$ )

10

5

0

-5

Control diet

Healthy Nordic diet

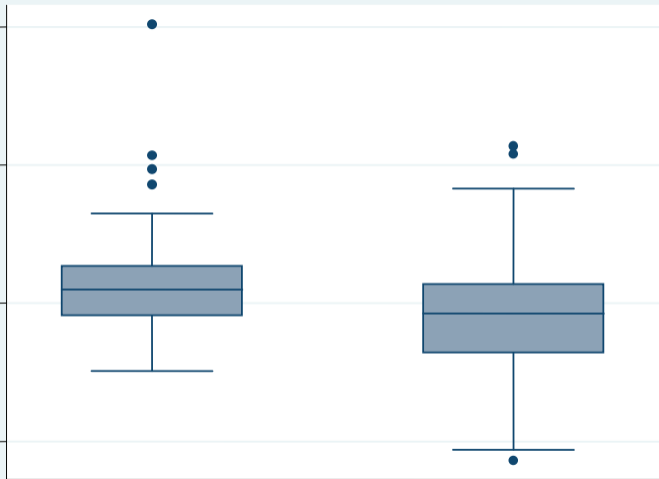

Supplement: MOESM1 [file 25654140]
